# Supplementary material for: Preparation of UiO-66-NH 2 /MgAl-LDHs @ Sodium Alginate Fiber Membrane and Determination of Oil Water Separation Performance
Source: Research Square preprint supplement (doi:10.21203/rs.3.rs-6820860/v1), 2025-07-01
Supplement: Supplementary file 1 [file 39f830764890d8ef1d700169.docx]

**Supporting Information**

Preparation of UiO-66-NH2/MgAl-LDHs @ Sodium Alginate Fiber Membrane and Determination of Oil Water Separation Performance

Hongmei Wanga, Jiawen Zhanga, Zhenggang Wanga*, Shuang Hua, Zhuang Fua, Bo Hub, Xichao Liangb*.

*aHunan Provincial Key Laboratory of Materials Protection for Electric Power and Transportation, Changsha University of Science and Technology, Changsha 410114, PR China.*

*bResearch and Application of Regenerative Cellulose Fiber Key Laboratory of Sichuan Province, YiBin Grace Group Co., LTD, Yibin 644000, China*

* Corresponding authors.

E-mail addresses: [zhenggangwang16@163.com](mailto:zhenggangwang16@163.com) (Zhenggang Wang), xichaoliang@126.com (Xichao Liang).

[Fig. S1.SEM images of MgAl-LDH (a) and UiO-66-NH](#_Toc190810920)[2](#_Toc190810920) [(b). 3](#_Toc190810920)

[Fig. S2. XRD spectra of U-LDH](#_Toc190810921)[3](#_Toc190810921)[@SA (a) and Raman spectra of synthesized UiO-66-NH2, MgAl-LDH and U-LDH](#_Toc190810921)[3](#_Toc190810921) [(b). 3](#_Toc190810921)

Fig. S3. SEM images of U-LDH3@SA. 3

[Fig. S4. Pore size distribution of pure SA (a) and U-LDH](#_Toc190810922)[3](#_Toc190810922)[@SA (b). 4](#_Toc190810922)


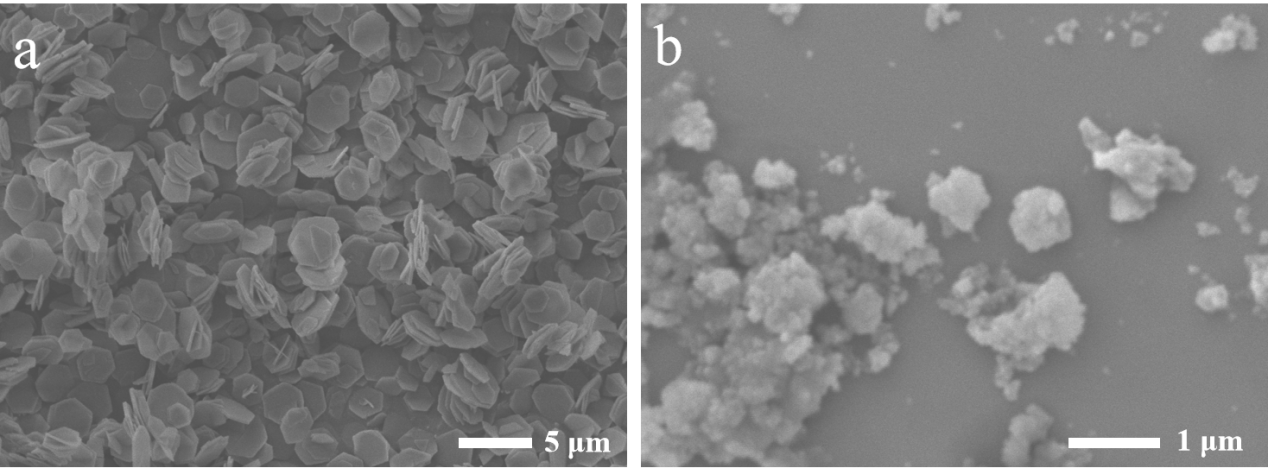


**Fig. S1.** SEM images of MgAl-LDH (a) and UiO-66-NH2 (b).


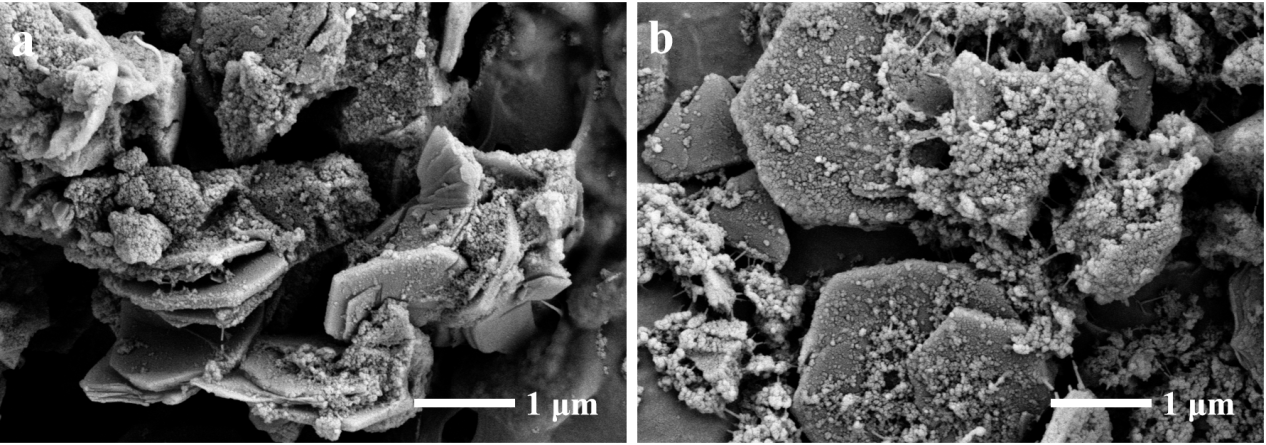


**Fig. S2.** SEM images of U-LDH3@SA.


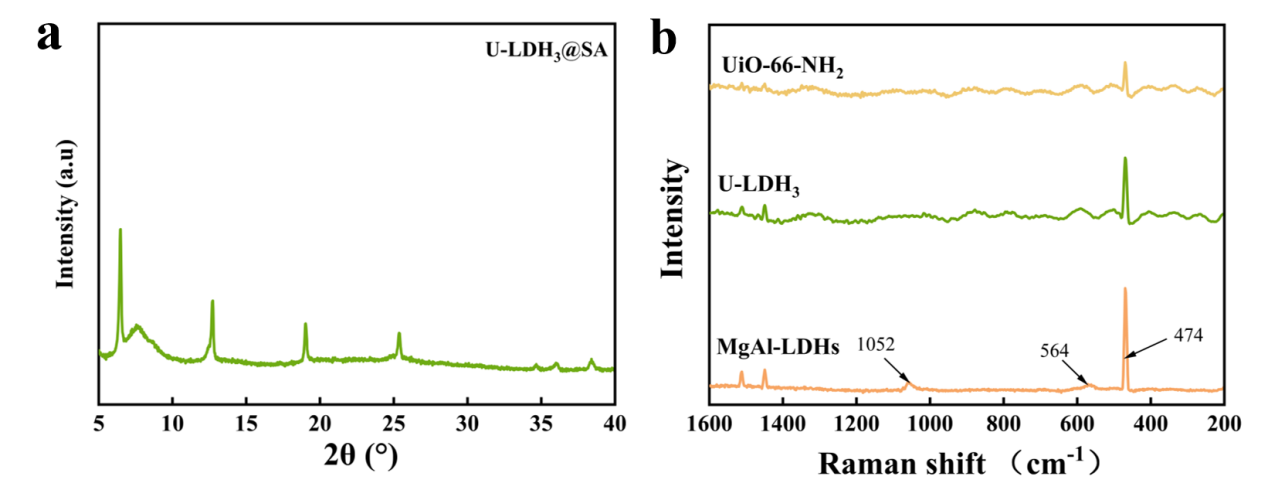


**Fig. S3.** XRD spectra of U-LDH3@SA (a) and Raman spectra of synthesized UiO-66-NH2, MgAl-LDH and U-LDH3 (b).


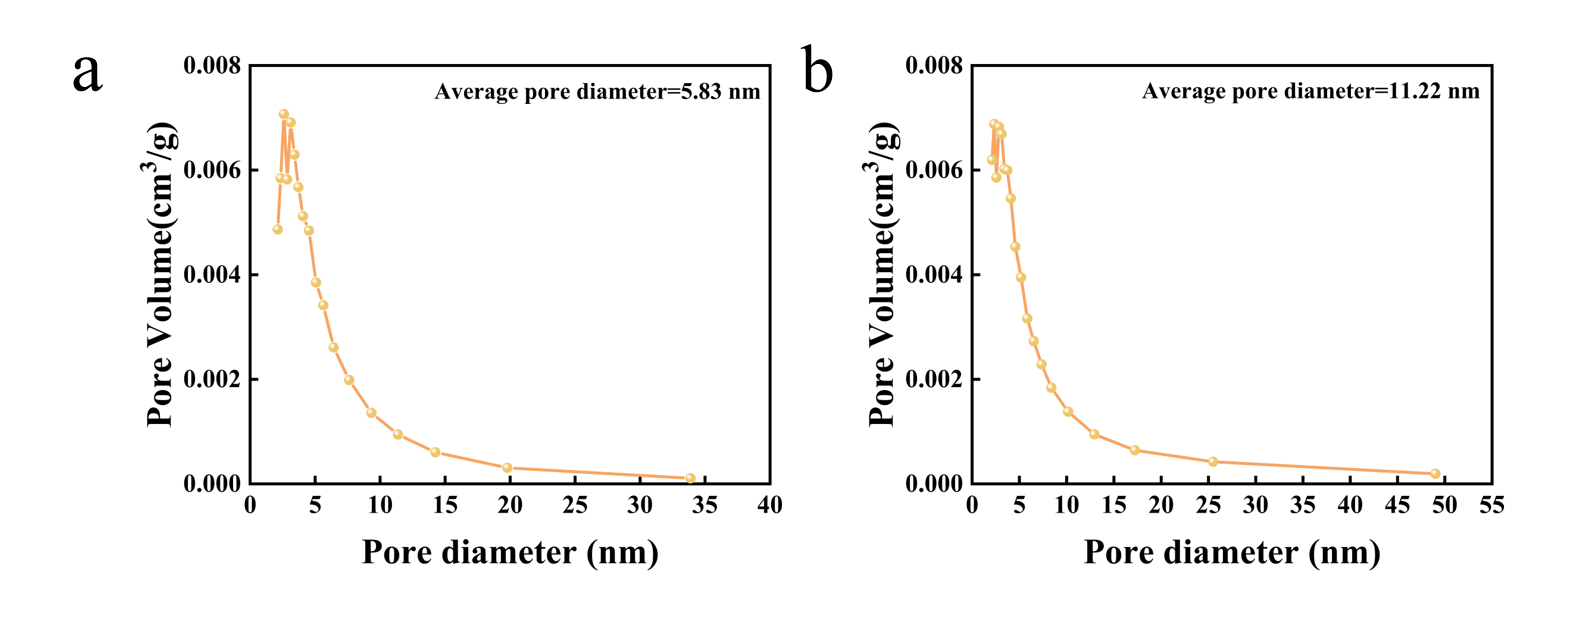


**Fig. S4.** Pore size distribution of pure SA (a) and U-LDH3@SA (b).
